# Supplementary material
Source: MDPI journal article supplement (https://www.mdpi.com/2077-0472/11/3/202)
Supplement: s1 [file s1]

## SURVEY QUESTIONS

To what extent do you share the following opinions regarding the ideal workplace.

Please rate on a scale from 1 to 7, where 1 means definitely not, 4 - no opinion, 7 - definitely yes.

| NO. | Area features                                                                      | Ideal workplace |   |   |   |   |   |   |
|-----|------------------------------------------------------------------------------------|-----------------|---|---|---|---|---|---|
|     |                                                                                    | 1               | 2 | 3 | 4 | 5 | 6 | 7 |
| 1   | work matching your interests                                                       | 1               | 2 | 3 | 4 | 5 | 6 | 7 |
| 2   | challenging work                                                                   | 1               | 2 | 3 | 4 | 5 | 6 | 7 |
| 3   | allows you to make full use of all your skills and knowledge                       | 1               | 2 | 3 | 4 | 5 | 6 | 7 |
| 4   | ensures high variability of tasks performed                                        | 1               | 2 | 3 | 4 | 5 | 6 | 7 |
| 5   | allows you to decide for yourself how to perform your duties                       | 1               | 2 | 3 | 4 | 5 | 6 | 7 |
| 6   | involves a high volume and rapid pace of work                                      | 1               | 2 | 3 | 4 | 5 | 6 | 7 |
| 7   | involves irregular working hours                                                   | 1               | 2 | 3 | 4 | 5 | 6 | 7 |
| 8   | requires mobility                                                                  | 1               | 2 | 3 | 4 | 5 | 6 | 7 |
| 9   | ease of commuting                                                                  | 1               | 2 | 3 | 4 | 5 | 6 | 7 |
| 10  | involves working in an attractive location                                         | 1               | 2 | 3 | 4 | 5 | 6 | 7 |
| 11  | guarantees a high remuneration                                                     | 1               | 2 | 3 | 4 | 5 | 6 | 7 |
| 12  | offers extensive social and living benefits                                        | 1               | 2 | 3 | 4 | 5 | 6 | 7 |
| 13  | provides you with modern equipment needed to perform your duties                   | 1               | 2 | 3 | 4 | 5 | 6 | 7 |
| 14  | offers stable employment conditions                                                | 1               | 2 | 3 | 4 | 5 | 6 | 7 |
| 15  | enables you to influence decisions vital to the company                            | 1               | 2 | 3 | 4 | 5 | 6 | 7 |
| 16  | provides a clear career/promotion path                                             | 1               | 2 | 3 | 4 | 5 | 6 | 7 |
| 17  | enables you to improve your skills                                                 | 1               | 2 | 3 | 4 | 5 | 6 | 7 |
| 18  | provides the opportunity for long-term professional development within the company | 1               | 2 | 3 | 4 | 5 | 6 | 7 |
| 19  | guarantees acquiring skills that may prove useful in other workplaces              | 1               | 2 | 3 | 4 | 5 | 6 | 7 |
| 20  | allows you to seamlessly balance your private and professional life                | 1               | 2 | 3 | 4 | 5 | 6 | 7 |
| 21  | friendly workplace atmosphere                                                      | 1               | 2 | 3 | 4 | 5 | 6 | 7 |
| 22  | ensures that you are treated with respect by clients and colleagues alike          | 1               | 2 | 3 | 4 | 5 | 6 | 7 |
| 23  | makes you feel supported by colleagues                                             | 1               | 2 | 3 | 4 | 5 | 6 | 7 |
| 24  | performed while working with competent colleagues                                  | 1               | 2 | 3 | 4 | 5 | 6 | 7 |
| 25  | provides a sense of belonging and integration with the team                        | 1               | 2 | 3 | 4 | 5 | 6 | 7 |
| 26  | related to providing high-quality products/services                                | 1               | 2 | 3 | 4 | 5 | 6 | 7 |
| 27  | characterised by high social prestige                                              | 1               | 2 | 3 | 4 | 5 | 6 | 7 |
| 28  | gives you a sense of pride in your duties                                          | 1               | 2 | 3 | 4 | 5 | 6 | 7 |
| 29  | working at a company that supports the local community                             | 1               | 2 | 3 | 4 | 5 | 6 | 7 |

Please express your opinion on the following statements on a scale of 1 to 7, where 1 means definitely not, 4 - no opinion, 7 - definitely yes.

| NO. | Area features                                                                             | Ideal workplace |   |   |   |   |   |   |
|-----|-------------------------------------------------------------------------------------------|-----------------|---|---|---|---|---|---|
| 1   | I believe that working in agribusiness be attractive in the short-term of a career        | 1               | 2 | 3 | 4 | 5 | 6 | 7 |
| 2   | I believe that working in agribusiness be attractive in the long-term of a career         | 1               | 2 | 3 | 4 | 5 | 6 | 7 |
| 3   | I am going to take up a full-time job after graduating                                    | 1               | 2 | 3 | 4 | 5 | 6 | 7 |
| 4   | I am positive about agribusiness as a workplace                                           | 1               | 2 | 3 | 4 | 5 | 6 | 7 |
| 5   | I am going to work as a sales representative in agribusiness                              | 1               | 2 | 3 | 4 | 5 | 6 | 7 |
| 6   | I think that I can easily find employment outside agribusiness on similar or better terms | 1               | 2 | 3 | 4 | 5 | 6 | 7 |

After graduation, I intend to start my own business.

|     |  |    |  |
|-----|--|----|--|
| yes |  | no |  |
|-----|--|----|--|

Gender

|        |  |      |  |
|--------|--|------|--|
| female |  | male |  |
|--------|--|------|--|

Age .....

Professional experience in months .....
